# Supplementary material for: Bioactive PCL microspheres with enhanced biocompatibility and collagen production for functional hyaluronic acid dermal fillers
Source: Royal Society of Chemistry journal article supplement (doi:10.1039/d1bm01846a), 2022-01-01
Supplement: d1bm01846a1.pdf [file d1bm01846a1.pdf]

## Supporting Information

### **Bioactive PCL microspheres with enhanced biocompatibility and collagen production for functional hyaluronic acid dermal filler**

Yun Heo<sup>†a</sup>, Sang-Woo Shint<sup>a</sup>, Da-Seul Kim<sup>a,b</sup>, Semi Lee<sup>a</sup>, So-Yeon Park<sup>a,c</sup>, Seung-Woon Baek<sup>a,d,e</sup>, Jun-Kyu Lee<sup>a</sup>, Jun Hyuk Kim<sup>a</sup> and Dong Keun Han<sup>\*a</sup>

<sup>a</sup>Department of Biomedical Science, CHA University, Seongnam-si, Gyeonggi 13488, Republic of Korea

<sup>b</sup>School of Integrative Engineering, Chung-Ang University, Dongjak-gu, Seoul 06511, Republic of Korea

<sup>c</sup>Division of Biotechnology, College of Life Sciences and Biotechnology, Korea University, Seongbuk-gu, Seoul 02841, Republic of Korea

<sup>d</sup>Department of Biomedical Engineering, SKKU Institute for Convergence, Sungkyunkwan University (SKKU), Suwon-si, Gyeonggi 16419, Republic of Korea

<sup>e</sup>Department of Intelligent Precision Healthcare Convergence, SKKU Institute for Convergence, Sungkyunkwan University (SKKU), Suwon-si, Gyeonggi 16419, Republic of Korea

<sup>†</sup>These authors contributed equally to this work.

**Table S1.** Mechanical properties of hydrogel fillers with microspheres

| Sample        | Complex viscosity (mPA) | Storage modulus G' (Pa) | Loss modulus G'' (Pa) |
|---------------|-------------------------|-------------------------|-----------------------|
| HA hydrogel   | 1,243,600               | 150.08                  | 43.58                 |
| HA/PCL        | 1,533,900               | 182.07                  | 63.28                 |
| HA/PCL/MH     | 1,287,600               | 151.75                  | 56.15                 |
| HA/PCL/MH/APO | 1,639,200               | 194.87                  | 66.74                 |
| HA/PCL/MH/ATX | 1,886,000               | 227.21                  | 67.43                 |

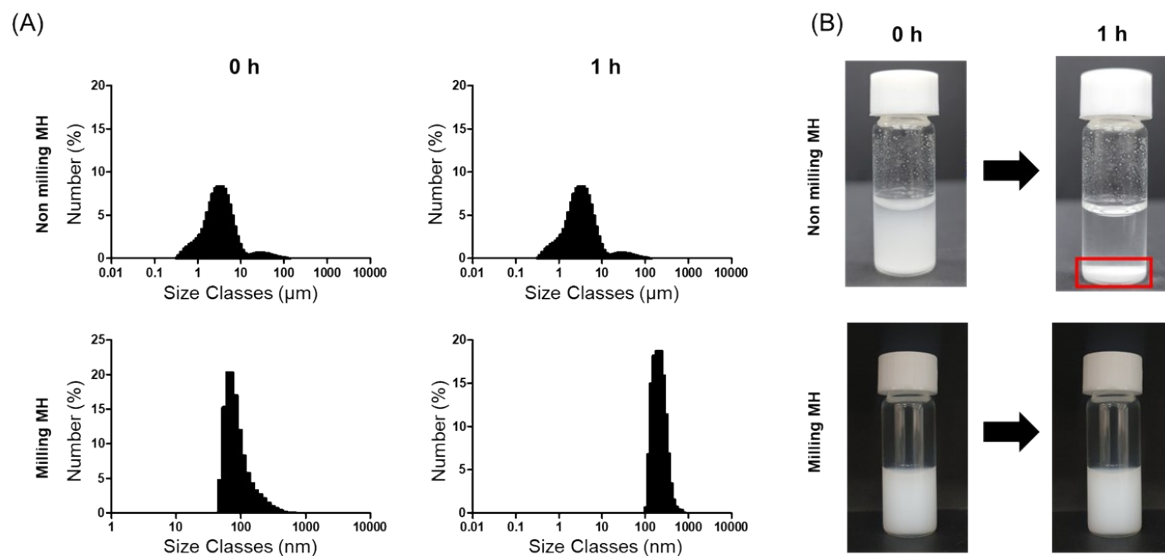

**Figure S1.** Milling of MH: (A) Size graph before and after milling of MH. (B) Dispersion Photograph of MH in water before and after milling.

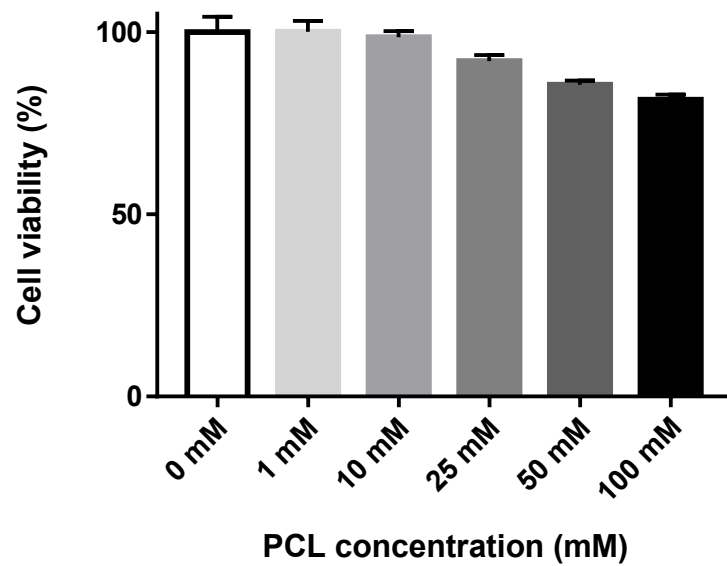

**Figure S2.** Cell viability of the various concentrations of PCL using hDFs by CCK-8 kit for 6 h.

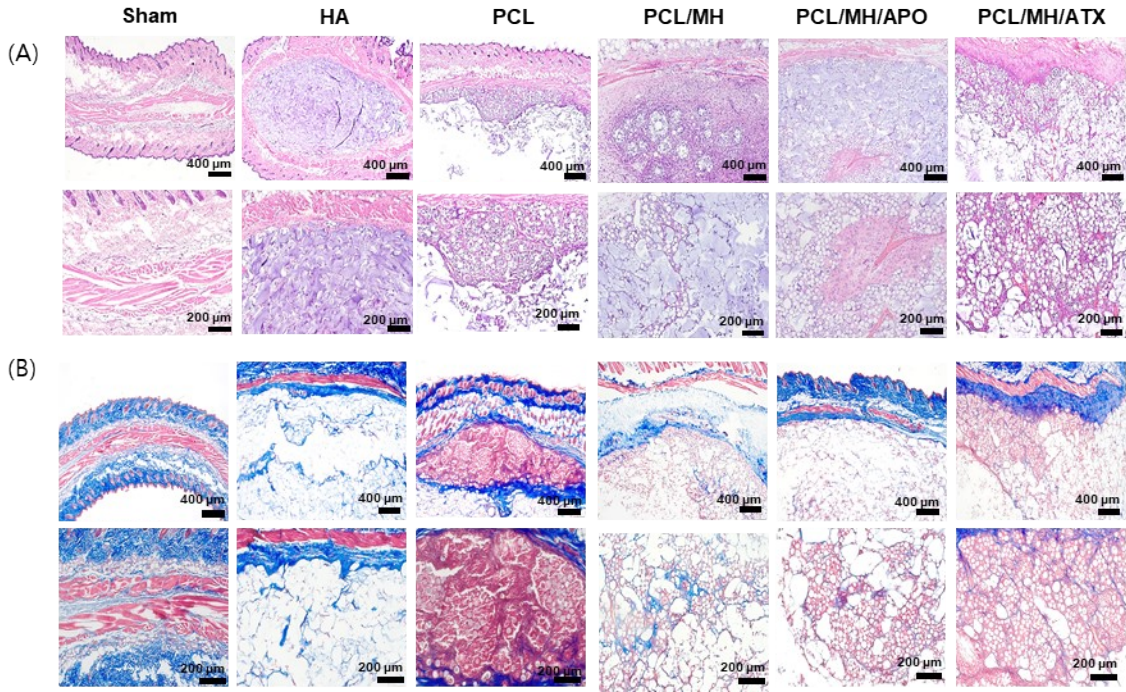

**Figure S3.** *In vivo* evaluation of PCL filler function: (A) H&E and (B) MT staining in a mouse model at 4 weeks post-implantation.

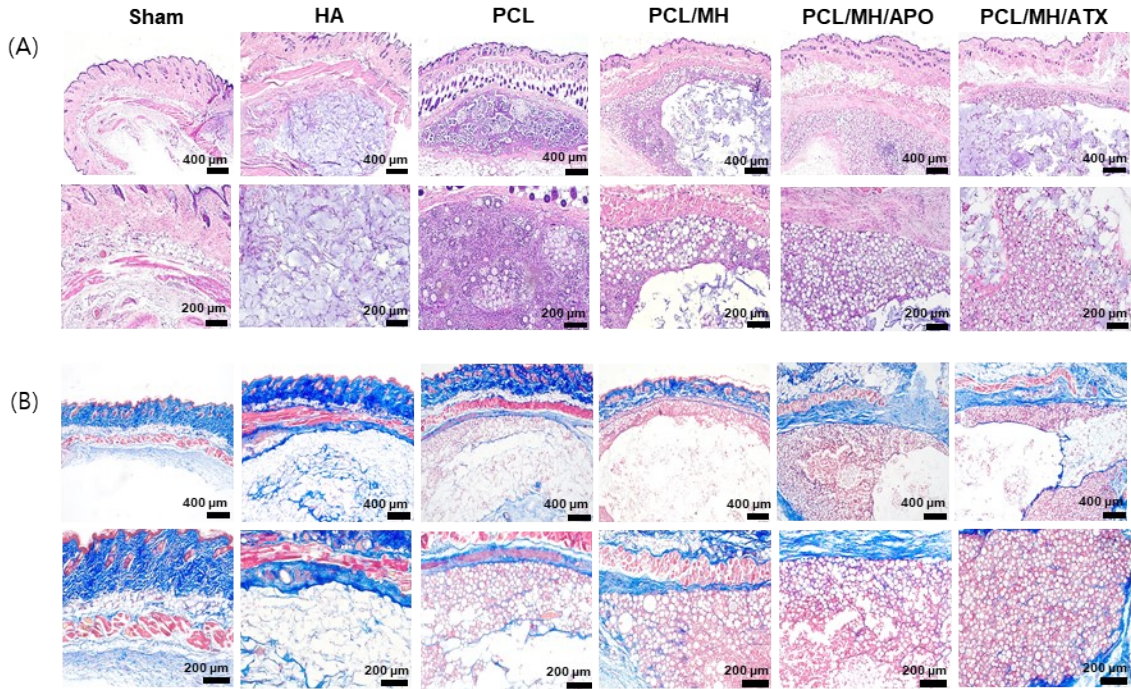

**Figure S4.** *In vivo* evaluation of PCL filler function: (A) H&E and (B) MT staining in a mouse model at 8 weeks post-implantation.
